# Supplementary material for: Body Composition, Dietary Intake and the Risk of Low Energy Availability in Elite-Level Competitive Rhythmic Gymnasts
Source: MDPI journal article supplement (doi:10.3390/nu13062083), 2021-06-18
Supplement: s1 [file s1]

Supplementary

# Body Composition, Dietary Intake and the Risk of Low Energy Availability in Elite-Level Competitive Rhythmic Gymnasts

María Villa <sup>1</sup>, José Gerardo Villa <sup>2</sup>, Jesus Seco-Calvo <sup>2,3,\*</sup>, Juan Mielgo-Ayuso <sup>4</sup> and Pilar S. Collado <sup>2</sup>

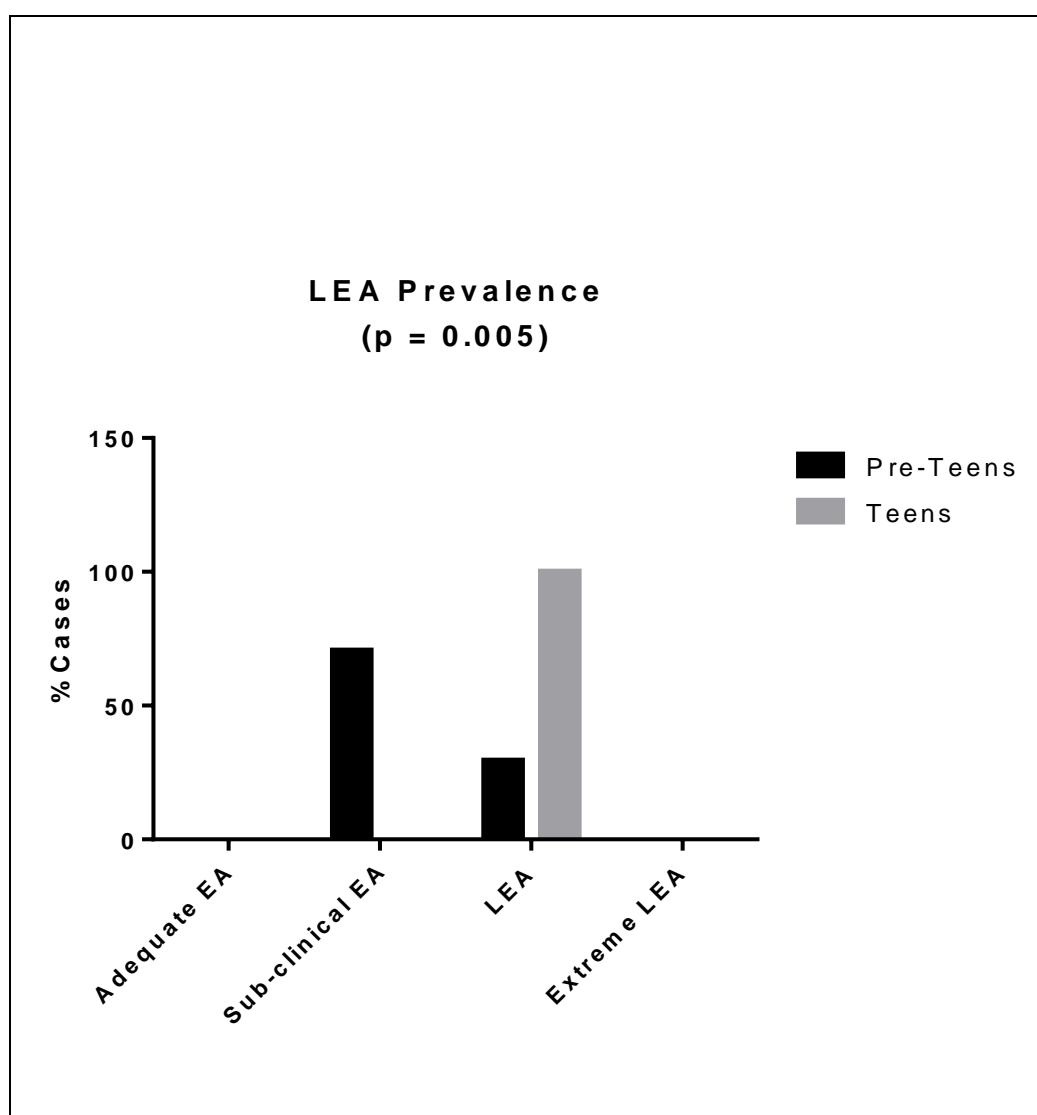

**Figure S1.** Low energy availability (LEA) prevalence of in each study group. Data are expressed as a percentage of cases. Adequate EA: > 45 kcal/kg FFM/day; Sub-clinical EA: 30–45 kcal/kg FFM/day; LEA: < 30 kcal/kg FFM and extreme LEA: < 10 kcal/kg FFM [13,20].  $p$ :  $p$ -value for differences between groups by chi-square test ( $p < 0.05$  being considered significant).
